# Supplementary material for: Proximity proteomics of synaptopodin provides insight into the molecular composition of the spine apparatus of dendritic spines
Source: PubMed Central journal article supplement (PMC9586327; doi:10.1073/pnas.2203750119), 2022-10-10
Supplement: pnas.2203750119.sapp.pdf [file pnas.2203750119.sapp.pdf]

1

## 2 **Supplementary Information for**

### 3 **Proximity proteomics of synaptopodin provides insight into the molecular composition of the** 4 **spine apparatus of dendritic spines**

5 **Hanieh Falahati, Yumei Wu, Vanessa Feuerer, Hans-Georg Simon and Pietro De Camilli**

6 **Pietro De Camilli.**

7 **E-mail: [pietro.decamilli@yale.edu](mailto:pietro.decamilli@yale.edu)**

#### 8 **This PDF file includes:**

- 9 Figs. S1 to S4
- 10 Tables S1 to S3
- 11 Legend for Movie S1
- 12 Legend for Dataset S1

#### 13 **Other supplementary materials for this manuscript include the following:**

- 14 Movie S1
- 15 Dataset S1

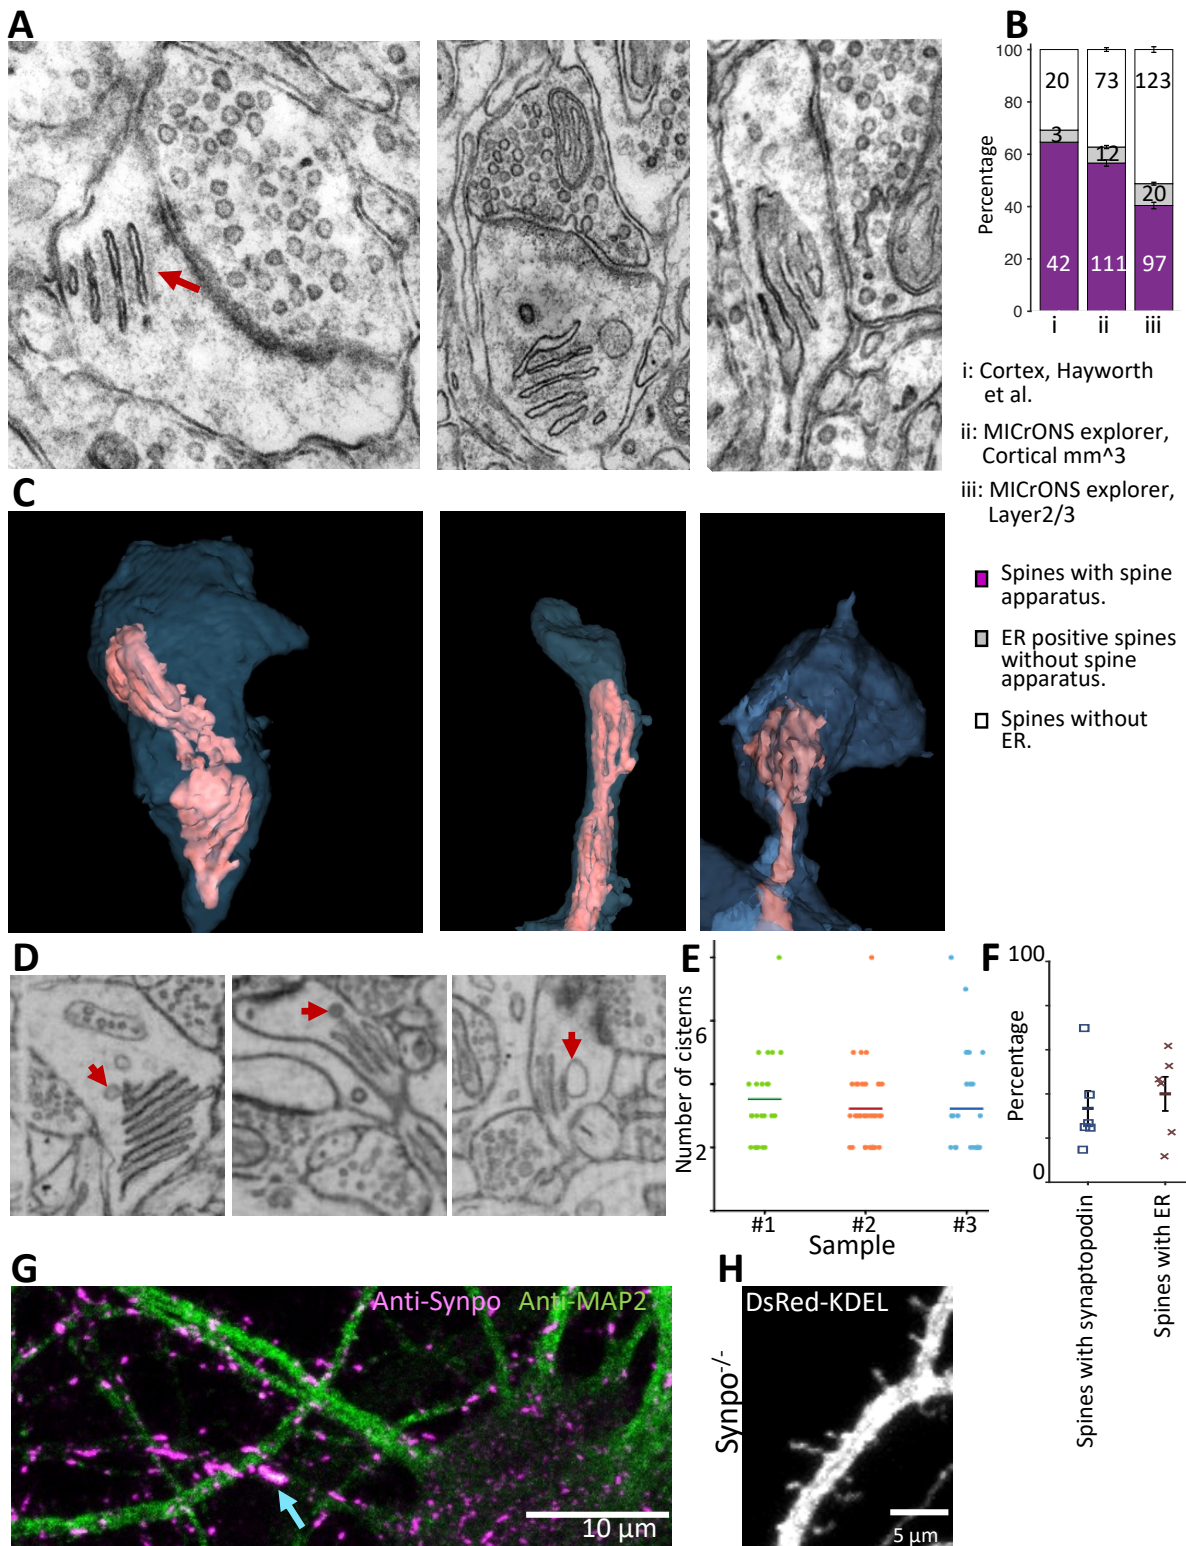

**Fig. S1.** Morphological features of the SA in neurons of the mouse cerebral cortex. **A.** Examples of SA as visualized by transmission EM. Red arrow shows the dense matrix at the free surface of an outer cistern. **B.** Quantification of the number of spines with spine apparatus (magenta), with ER but not spine apparatus (gray) and without ER (white). Samples analyzed are as follows: FIB-SEM volumes of cerebral cortex reported in Heyworth et al. (23) (i); 196 spines from five neurons in Cortex mm<sup>3</sup> (ii) and 240 spines from five neurons in layer2/3 (iii) datasets available on MICrONS explorer. Error bars in ii and iii show the standard deviation over mean for the five neurons in each of the two dataset. **C.** Examples of semiautomatically reconstructed dendritic spines and SAs from 3D volumes acquired by FIB-SEM. The ER is in red and the plasma membrane in blue. **D.** Examples of SAs in contact with tubulovesicular structures (red arrows). **E.** Number of cisterns per SA in three distinct samples of cerebral cortices (23). Each point represents a single SA, and the mean number of stacks for each sample is shown as a line. Data and images reported in C-D were extracted from FIB-SEM acquired 3D volumes published previously (23). **F.** Percentage of spines with synaptopodin, and spines with ER in cultured hippocampal neurons. Each point represent a single neuron. Means and the standard deviations are shown. **G.** In a subset of cultured hippocampal neurons, anti-synaptopodin staining shows the localization of this protein at axonal initial segment (blue arrow, note the lack of MAP2 staining). **H.** Presence of ER in dendritic spines of a cultured hippocampal neuron of a synaptopodin KO mouse expressing the ER marker DsRed-KDEL.

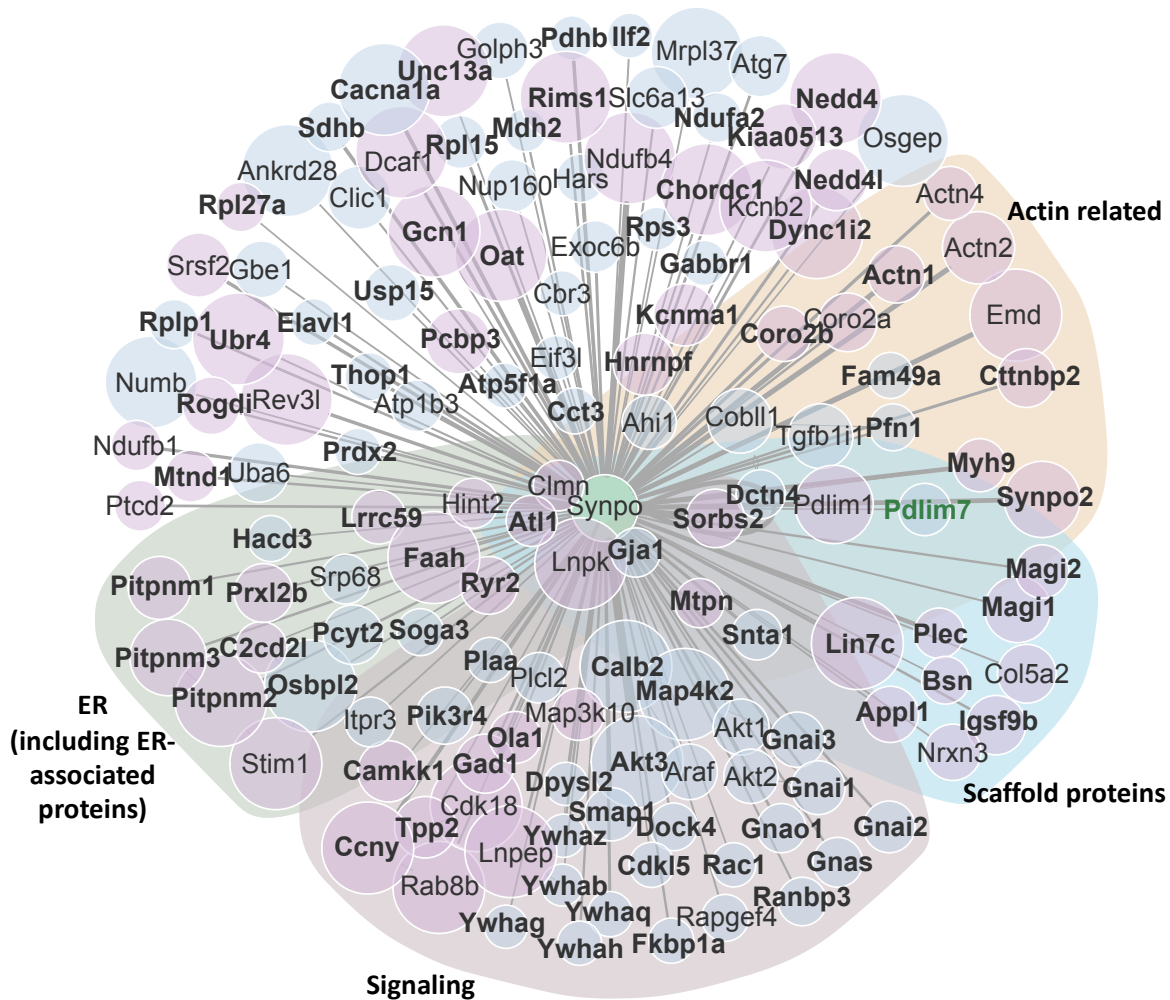

**Fig. S2.** Proteins identified as neighbors of synaptopodin by proximity labeling. Proteins identified in the first and second round of proximity biotinylation are shown in blue and purple circles, respectively. The size of the circles correlates with the enrichment in BioID2-Synpo samples relative to BioID2-Shank3\* samples, and the size of the lines correlates with the significance of the enrichment  $[-\log(p_{value})]$ . Proteins of different functional classes are grouped in different shades.

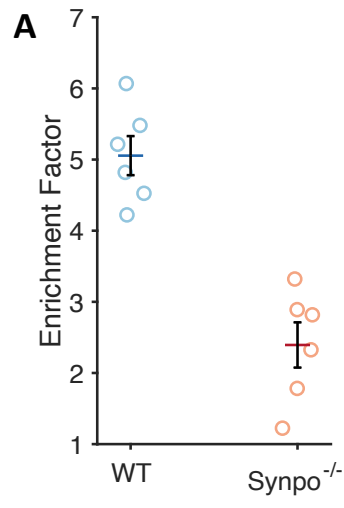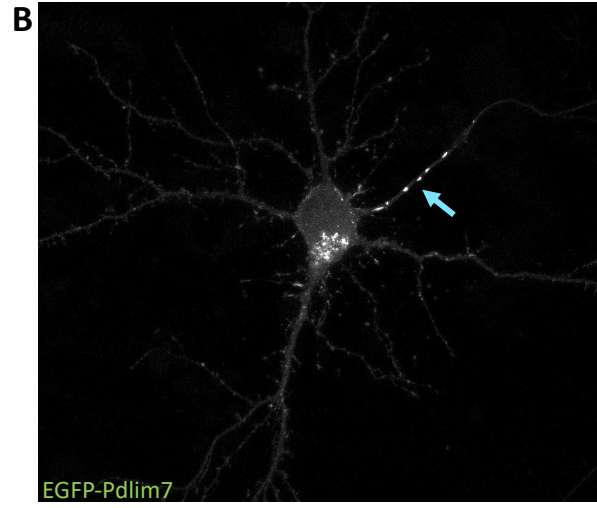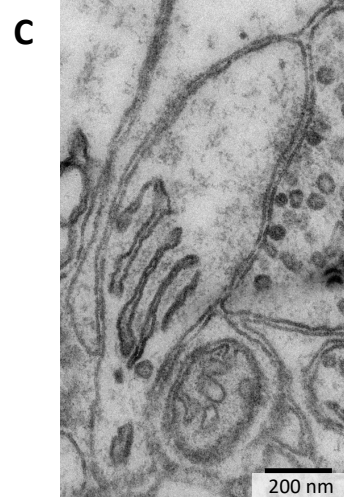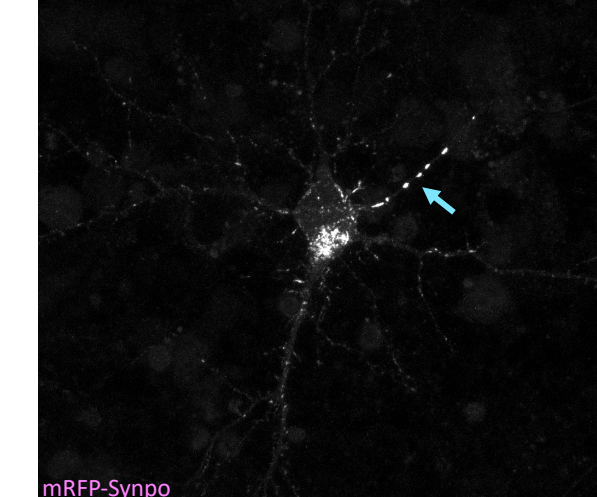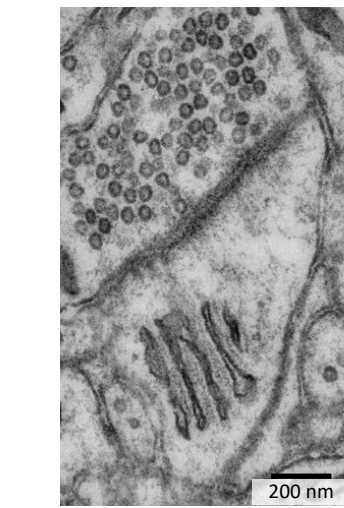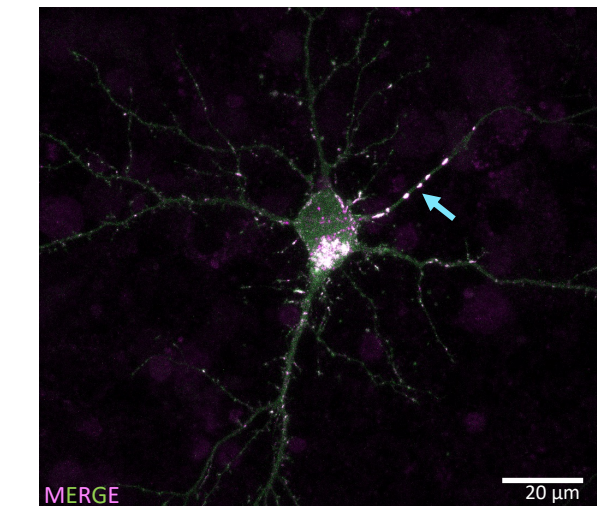

**Fig. S3.** Association between Pdlim7 and Synaptopodin in neurons. **A.** Enrichment factor for EGFP-Pdlim7 at the dendritic spines compared to dendritic shaft is calculated for wild-type (WT) and synaptopodin KO neurons. Each point represents a single neuron. **B.** Pdlim7 colocalizes with synaptopodin at axonal initial segment (blue arrow). **C.** Transmission EM of spine apparatus in Pdlim7 KO mice.

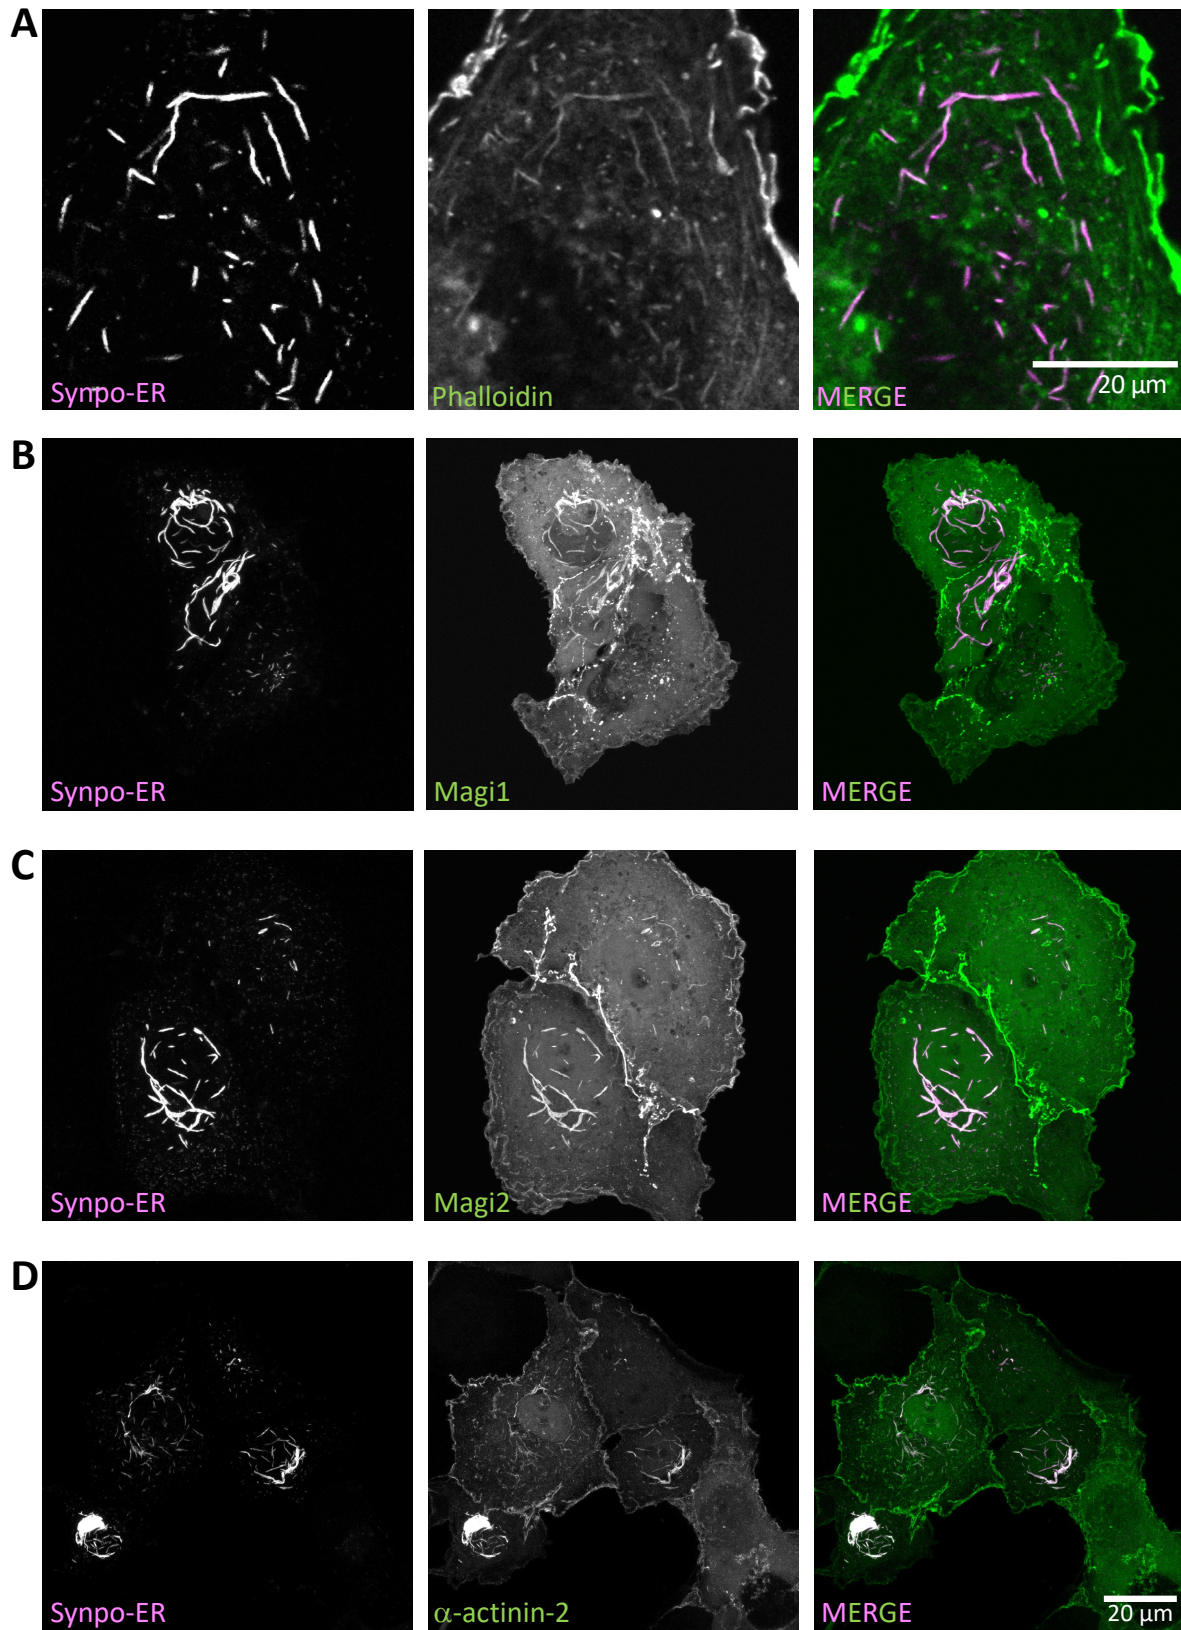

**Fig. S4.** Synaptopodin interacts with  $\alpha$ -actinin-2, MAGI1 and MAGI2 in COS-7 cells. **A.** Expression of synaptopodin-ER in COS-7 cells results in the formation of large synaptopodin assemblies on the ER that contain filamentous actin as revealed by phalloidin. **B-D.** In these cells, coexpression of synaptopodin-ER (Synpo-mCherry-Sec61 $\beta$ ) with EGFP- Magi1 (**C**), EGFP-Magi2 (**D**), or EGFP- $\alpha$ -actinin-2 (**B**) results in the recruitment of these proteins to assemblies of the ER- tethered synaptopodin.

**Table S1. List of ER associated proteins examined for their interaction and colocalization with synaptopodin (Synpo).**

| Protein  | Significantly enriched in the proximity of Synpo vs. Shank3 | Found in the proximity of Synpo | Type of experiment                                                                         | Localization                                                                                                                               | Reagent                                                  |
|----------|-------------------------------------------------------------|---------------------------------|--------------------------------------------------------------------------------------------|--------------------------------------------------------------------------------------------------------------------------------------------|----------------------------------------------------------|
| Stim1    | Yes                                                         | Yes                             | Coexpression in neurons with Synaptopodin, with or without Orai                            | Diffuse throughout the entire ER                                                                                                           | Addgene plasmid #18857                                   |
| LRRC59   | Yes                                                         | Yes                             | Coexpression in COS7 cells and neurons with Synaptopodin                                   | Clusters on ER in COS7 cells; not enriched in the spines                                                                                   | pEGFP-LRRC59 (this study), anti-LRRC59 (Sigma HPA030829) |
| Soga3    | Yes                                                         | Yes                             | Coexpression in COS7 cells and neurons with Synaptopodin                                   | Diffuse throughout the entire ER                                                                                                           | pEGFP-Soga3 (this study)                                 |
| Plekhf2  | Yes                                                         | Yes                             | Coexpression in COS7 cells and neurons with Synaptopodin                                   | Diffuse throughout the entire ER and on endosome-like structures in COS7 cells; In neurons enriched in the spines                          | Plekhf-EGFP (this study)                                 |
| Calmin   | Yes                                                         | Yes                             | Coexpression in COS7 cells with Synaptopodin                                               | Diffuse throughout the entire ER                                                                                                           | pEGFP-Calmin (this study)                                |
| LnPk     | Yes                                                         | Yes                             | Coexpression in COS7 cells and neurons with Synaptopodin                                   | Diffuse throughout the ER in COS7 cells, Partial colocalization with synaptopodin in neurons                                               | Addgene plasmid #86687                                   |
| Faah     | Yes                                                         | Yes                             | antibody staining                                                                          | Everywhere (not sure of the antibodies specificity in neurons)                                                                             | Abcam ab54615                                            |
| Pitpnm1  | Yes                                                         | Yes                             | Coexpression in HeLa cells and neurons with Synaptopodin                                   | Cytosolic in HeLa, Partial overlap with Synpo in neurons                                                                                   | Construct from De Camilli lab                            |
| Pitpnm2  | Yes                                                         | Yes                             | Coexpression in HeLa cells and neurons with Synaptopodin                                   | Cytosolic in HeLa, diffuse throughout the entire neurons                                                                                   | Construct from De Camilli lab                            |
| Inf-2    | No                                                          | Yes                             | Coexpression in COS7 cells with Synaptopodin                                               | Diffuse throughout the entire ER.                                                                                                          | GFP-Inf-2 with CAAX (gift from Henry Higgs lab)          |
| Nesprin3 | No                                                          | Yes                             | Coexpression in COS7 cells with Synaptopodin                                               | No colocalization                                                                                                                          | Addgene plasmid #54203                                   |
| VAPB     | No                                                          | Yes                             | Coexpression in COS7 cells and neurons with Synaptopodin                                   | Diffuse throughout the entire ER                                                                                                           | Construct from De Camilli lab                            |
| MOSPD1   | No                                                          | No                              | Coexpression in COS7 cells and neurons with Synaptopodin                                   | Diffuse throughout the entire ER                                                                                                           | Gift from Jacques Neefjes lab                            |
| MOSPD2   | No                                                          | No                              | Coexpression in COS7 cells with Synaptopodin                                               | Diffuse throughout the entire ER                                                                                                           | Gift from Fabien Alpy lab                                |
| MOSPD3   | No                                                          | No                              | Coexpression in COS7 cells with Synaptopodin                                               | Diffuse throughout the entire ER                                                                                                           | Gift from Jacques Neefjes lab                            |
| TMCC1    | No                                                          | No                              | Coexpression in COS7 cells with Synaptopodin and Pdim7, coexpression in neurons with Synpo | No colocalization with Synpo. Pdim7 alone can be wrapped in TMCC1 assemblies, but this association is disrupted when Synpo is coexpressed. | Addgene plasmid #120931                                  |
| TMCC2    | No                                                          | No                              | Coexpression in COS7 cells with Synaptopodin                                               | On ER, with some bright assemblies. No colocalization with Synpo                                                                           | Addgene plasmid #121047                                  |
| TMCC3    | No                                                          | No                              | Coexpression in COS7 cells with Synaptopodin                                               | On ER, with some bright assemblies. No colocalization with Synpo                                                                           | Addgene plasmid #121048                                  |
| CLIMP-63 | No                                                          | No                              | Coexpression in COS7 cells and neurons with Synaptopodin                                   | Clusters on ER, in neurons mostly in cell body. No colocalization with Synpo                                                               | Gift from Bewersdorf lab                                 |

**Table S2. List of antibodies used in this study.**

| Protein                      | Company; Catalog number   | Antibody species | Working dilution for immunocytochemistry | Working dilution for immunoblotting |
|------------------------------|---------------------------|------------------|------------------------------------------|-------------------------------------|
| Synaptopodin                 | Sigma S9442-200UL         | Rabbit           | 1:1000                                   | 1:2500                              |
| BioID2                       | BioFront Tech BID2-CP-100 | Chicken          | 1:1000                                   | NA                                  |
| Streptavidin-Alexa Fluor 647 | Thermofisher S21374       |                  | 1:1000                                   | 1:5000                              |
| HA                           | Sigma 12158167001         | Rat              | 1:500                                    | NA                                  |
| Phalloidin-Alexa Fluor 488   | Thermofisher A12379       |                  | 1:300                                    | NA                                  |

**Table S3. List of constructs produced in this study.**

| Construct                               | Cloning method                           | Primers                                                                                                                      | Backbone                 | Template/insert          |
|-----------------------------------------|------------------------------------------|------------------------------------------------------------------------------------------------------------------------------|--------------------------|--------------------------|
| CMV-BioID2-Synaptopodin                 | Digestion/ ligation with AgeI and BsrGI  | Primer 1: AGCGCTACCGGTATGttcaagaacctgatctggctg<br>Primer 2: tccgactgtacaagcttctctcaggctgaactc                                | mRFP-Synaptopodin        | MCS-BioID2-HA            |
| pAAV-BioID2-Synaptopodin                | Digestion/ ligation with NdeI and ClaI   | Primer 1: GTGTATCATATGCCAAGTACG<br>Primer 2: agatctatcgatTAAGATACATTGATGAGTTTGGAC                                            | pAAV-GFP-MCS             | CMV-BioID2-Synaptopodin  |
| pAAV-BioID2-Shank3                      | Digestion/ ligation with BglII and EcoRI | Not applicable.                                                                                                              | pAAV-BioID2-Synaptopodin | mRFP-Shank3              |
| pAAV-BioID2-Shank3* (1055-1806)         | Digestion/ ligation with HindIII         | Not applicable.                                                                                                              | pAAV-BioID2-Shank3       |                          |
| pEGFP-Pdlim7                            | Gibson Assembly                          | Primer 1: ggactcagatctcgagctcaggattcctcaaggtagtctgg<br>Primer 2: cgtcgactgcagaattcgatcacacatgagagaaggcatggc                  | pEGFP-C1                 | Gene bank ID: AF345904.1 |
| pEGFP-Pdlim7-PDZ domain                 | PCR, Digestion / ligation                | Primer 1: GAGCTCAAGCTTTGGATTCCCTCAAGGTAGTGCTGG<br>Primer 2: TCCGGTGGATCCTTACTGGGCCCTGCTGAGGCC                                | Not applicable.          | pEGFP-Pdlim7             |
| pEGFP-Pdlim7-Linker only                | PCR, Digestion / ligation                | Primer 1: gcccgccgatcgtaaGTGAtogaattctgcagtcgacgg<br>Primer 2: gcccgccgatcgGGGAGTCTTGCCGTTGTTGC                              | Not applicable.          | pEGFP-Pdlim7             |
| pEGFP-Pdlim7-3 LIM domains              | PCR, Digestion / ligation                | Primer 1: gcccgccgatcgGTGTGTACCAGTGCCACAAGGTC<br>Primer 2: gcccgccgatcgagctcgagatctgagtcggga                                 | Not applicable.          | pEGFP-Pdlim7             |
| pEGFP-Pdlim7 $\Delta$ PDZ domain        | PCR, Digestion / ligation                | Primer 1: agctcgagatctCCGGTTCAGAGCAAACCGC<br>Primer 2: agctcgagatctgagtcggga                                                 | Not applicable.          | pEGFP-Pdlim7             |
| pEGFP-Pdlim7 $\Delta$ Linker region     | PCR, Digestion / ligation                | Primer 1: gcccgccgatcgGTGTGTACCAGTGCCACAAGGTC<br>Primer 2: gcccgccgatcgCTGGGCCCTGCTGAGGCC                                    | Not applicable.          | pEGFP-Pdlim7             |
| pEGFP-Pdlim7 $\Delta$ 3LIM domains      | PCR, Digestion / ligation                | Primer 1: gcccgccgatcgtaaGTGAtogaattctgcagtcgacgg<br>Primer 2: gcccgccgatcgGGGAGTCTTGCCGTTGTTGC                              | Not applicable.          | pEGFP-Pdlim7             |
| pEGFP-Magi1                             | PCR, Digestion / ligation                | Primer 1: GAGCTCAAGCTTattcgaagtgatccagaagaagaac<br>Primer 2: GCCCGCGGTACctcagatctgaggtcgggtg                                 | pEGFP-C1                 | pCDNA flag MAG1c         |
| pEGFP-Magi2                             | PCR, Digestion / ligation                | Primer 1: GCTCGAGGAATTCaACTACatgtccaaaagcttg<br>Primer 2: GCCCGCGGTACCtacttccggcaggcctg                                      | pEGFP-C1                 | Myc rat S-SCAM           |
| pAAV-BioID2-Pdlim7                      | PCR, Digestion / ligation                | Primer 1: cgtcgactgcagaattcgatcacacatgagagaaggcatggc<br>Primer 2: gagaagaagctggattcctcaaggtagtctgg                           | pAAV-BioID2-Shank3*      | pEGFP-Pdlim7             |
| Synpo-ER (Synpo-GFP-Sec61 $\beta$ )     | InFusion                                 | Primer 1: cgctagcgctaccggatggaggggtactcagaggaagc<br>Primer 2: catggtggcgaccggtacctgatccccactaccggaccctccctgaagcagaaggagggtcc | GFP-Sec61 $\beta$        | mRFP-Synpo               |
| Synpo-ER (Synpo-mCherry-Sec61 $\beta$ ) | Digestion-Ligation with BsrGI and AgeI   | Not applicable.                                                                                                              | Synpo-GFP-Sec61 $\beta$  | pmCherry-C1              |



16 **Movie S1. Part of a dendrite reconstructed using an in house semiautomatic algorithm from FIB-SEM images**  
17 **of mouse cortical neurons reported previously ( ? ). Plasma membrane is shown in blue, post-synaptic density**  
18 **in yellow, and ER in red.**

19 **SI Dataset S1 (dataset\_one.txt)**

20 Relative abundance of proteins (abundance in BioID2-synaptopodin/ abundance in BioID2-Shank3\*) significantly enriched  
21 in the proximity proteome of either synaptopodin or Shank3\*, and p-Value of the enrichment assessed by Students t-test.
